# Supplementary material for: UV absorption cross sections between 230 and 350 nm and pressure dependence of the photolysis quantum yield at 308 nm of CF3CH2CHO
Source: Royal Society of Chemistry journal article supplement (doi:10.1039/c1cp21368g), 2011-01-01
Supplement: c1cp21368g_2.pdf [file c1cp21368g_2.pdf]

Supplementary information

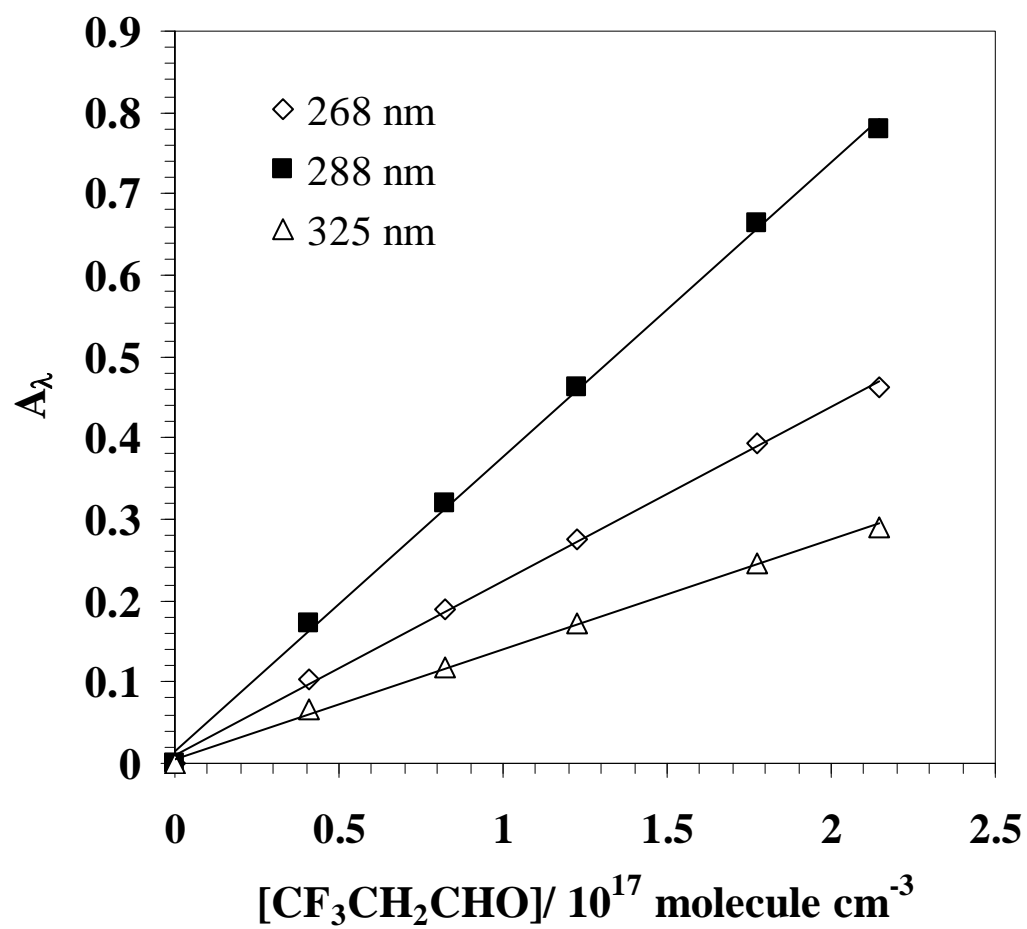

**Fig.S1.** Beer-Lambert law plots obtained at three different wavelengths at 298 K.
