# Supplementary material for: UV absorption cross sections between 230 and 350 nm and pressure dependence of the photolysis quantum yield at 308 nm of CF3CH2CHO
Source: Royal Society of Chemistry journal article supplement (doi:10.1039/c1cp21368g), 2011-01-01
Supplement: c1cp21368g_4.pdf [file c1cp21368g_4.pdf]

**Fig S3**

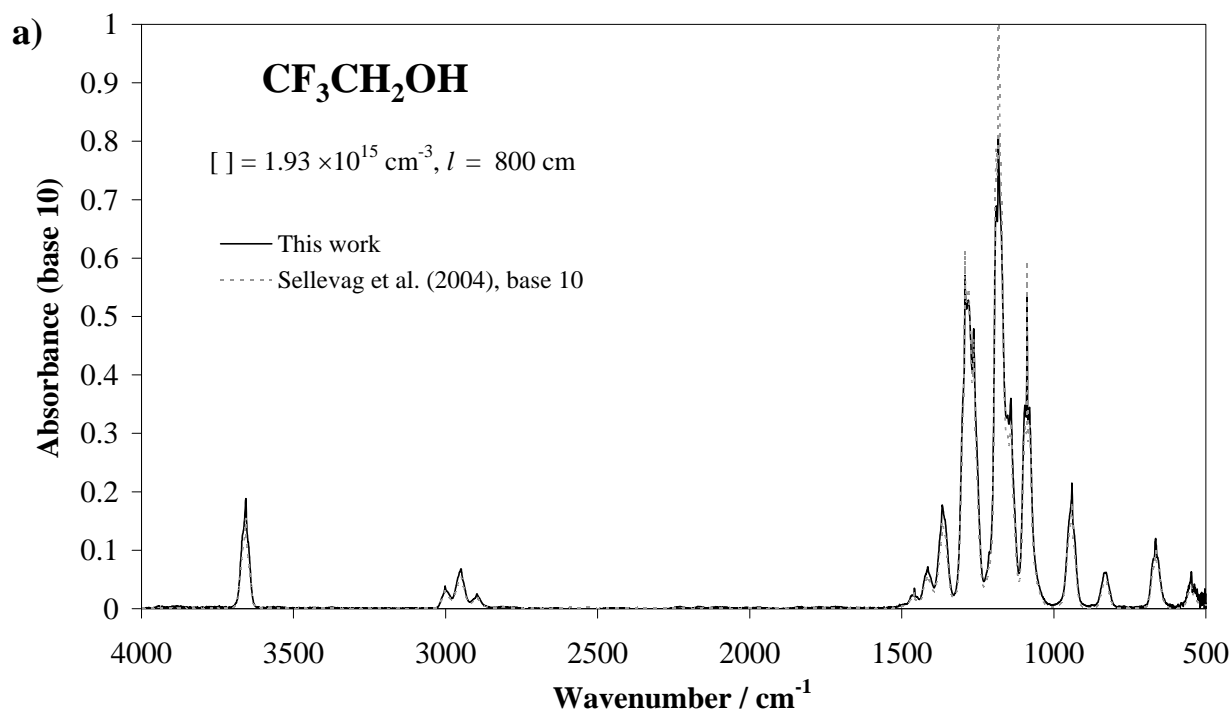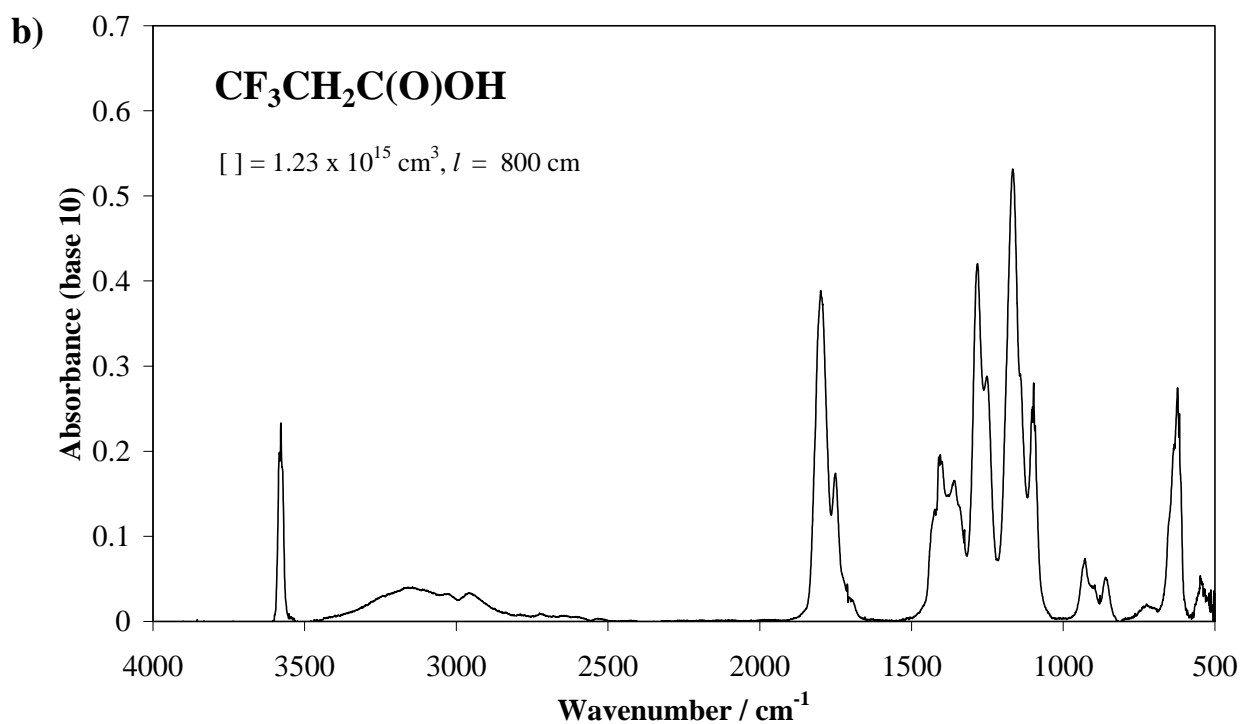

**Figure S3.** a) Infrared spectrum of CF<sub>3</sub>CH<sub>2</sub>OH recorded in this work together with that reported by Sellevåg et al. (2004); b) CF<sub>3</sub>CH<sub>2</sub>C(O)OH
