# Supplementary figures and images for: UV absorption cross sections between 230 and 350 nm and pressure dependence of the photolysis quantum yield at 308 nm of CF3CH2CHO
Source: Royal Society of Chemistry journal article supplement (doi:10.1039/c1cp21368g), 2011-01-01

**Figure S2**

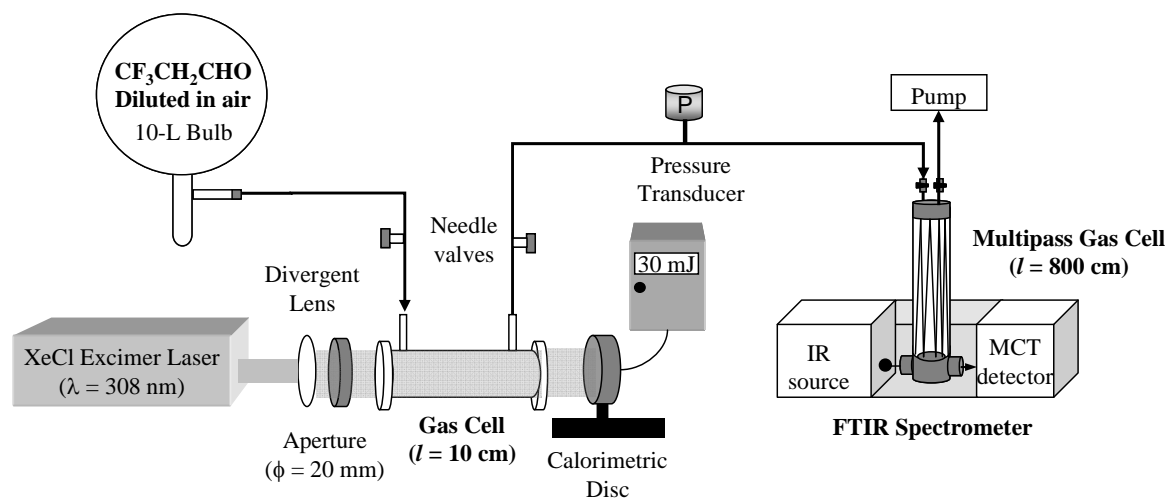

Supplement: c1cp21368g_3.pdf [file c1cp21368g_3.pdf]
